# Supplementary material
Source: publisher figshare collection journal article supplement (https://acs.figshare.com/ndownloader/files/5161882)

---

**Shape Selective Synthesis of Unusual Nanobipyramids, Cubes and Nanowires of  
RuO<sub>2</sub>: SnO<sub>2</sub>**

Niranjan S. Ramgir, Imtiaz S. Mulla and Kunjukrishna P. Vijayamohanana\*

Physical and Materials Chemistry Division

National Chemical Laboratory, Pune 411008, India

Email: [yiji@ems.ncl.res.in](mailto:yiji@ems.ncl.res.in)

---

**Supporting Information**

**SI 4. Table 1.** shows the distribution of diameter and average length of nanowires calculated for 10 nanowires.

| <b>Diameter (nm)</b> | <b>Number of Nanowires</b> | <b>Average Length (μm)</b> |
|----------------------|----------------------------|----------------------------|
| 100-200              | 1                          | 80                         |
| 200-400              | 2                          | 340                        |
| 400-600              | 2                          | 320                        |
| 600-800              | 2                          | 875                        |
| 800-900              | 3                          | 1045                       |

These results indicate that the nanowires with larger diameter between 700 and 900 nm have the maximum length compared with smaller diameter nanowires and are more preferred.

**SI 5** SEM images of nanowires upon heating the reaction mixture containing 0.2 wt. % RuO<sub>2</sub> in presence of (a) Ar, (b) N<sub>2</sub> and in (c) O<sub>2</sub>.

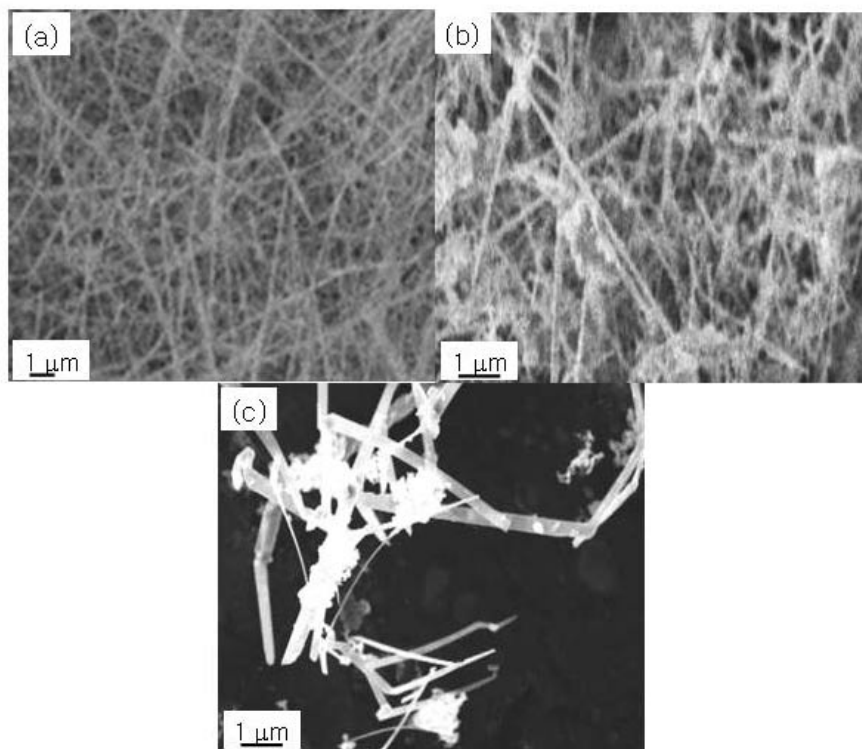

SI 6. Shape dependent response of RuO<sub>2</sub>: SnO<sub>2</sub> towards 500 ppm of NO<sub>2</sub> at room temperature.

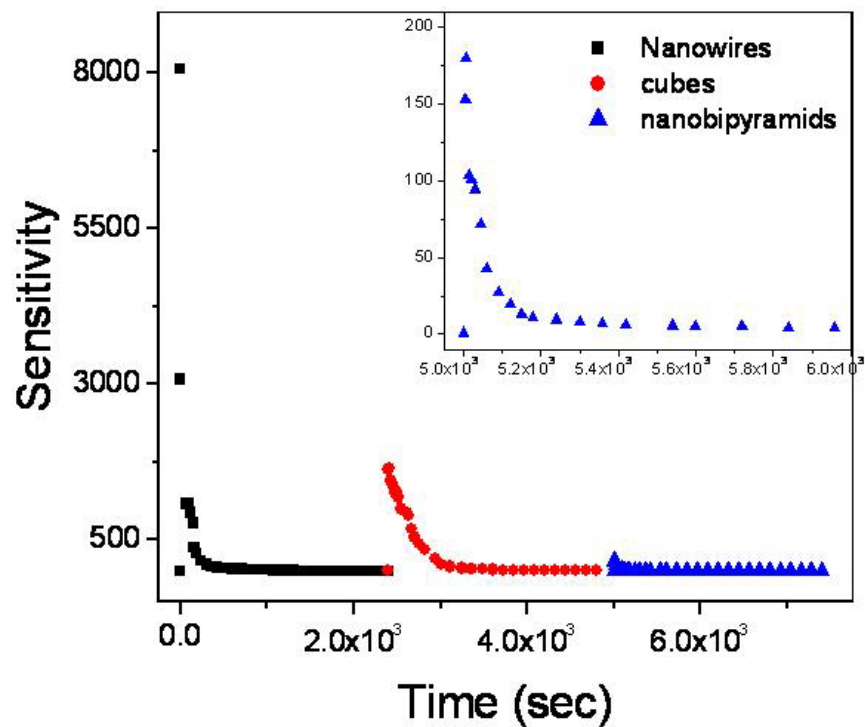

Supplement: Supplementary file 1 [file 5161882]
